# Supplementary material for: The bottom-up and top-down processing of faces in the human occipitotemporal cortex
Source: eLife journal article supplement (doi:10.7554/elife.48764), 2020-01-14
Supplement: supp [file context_defined_face_peak_latency_summary.xlsx]

## Sheet: Sheet1
	lOFA	lpFFA		rOFA	rpFFA	raFFA
s1	116	168		242	247	No peak
s2	174	243		No peak	83	No timrcourse
s3	68	68		182	179	123
s4	235	No peak		123	119	203
s5	93	97		106	106	106
s6	91	89		137	198	190
s7	198	198		163	58	178
s8	98	101		153	153	126
s9	155	83		203	205	138
s10	128	No peak		148	149	189
s11	123	128		148	158	No timrcourse
s12	165	181		109	No peak	No peak
s13	146	204		147	134	133
s14	No timrcourse	88		80	153	159
There are peak latency (in ms)summary of 14 subjects
