# Supplementary material for: The bottom-up and top-down processing of faces in the human occipitotemporal cortex
Source: eLife journal article supplement (doi:10.7554/elife.48764), 2020-01-14
Supplement: supp [file elife-48764-supp-v1.zip]

**A**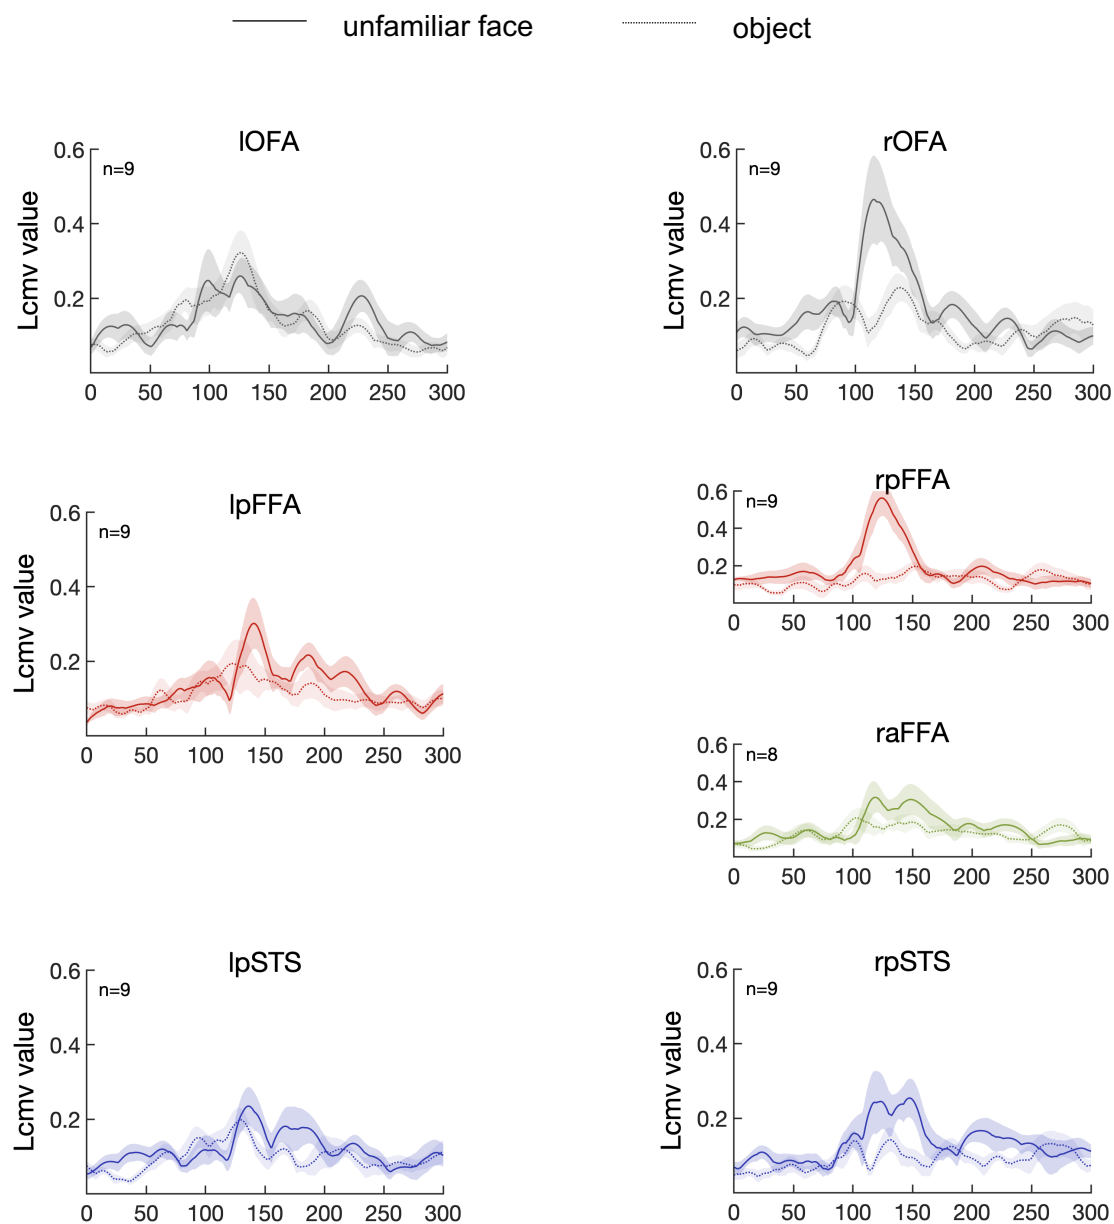**B**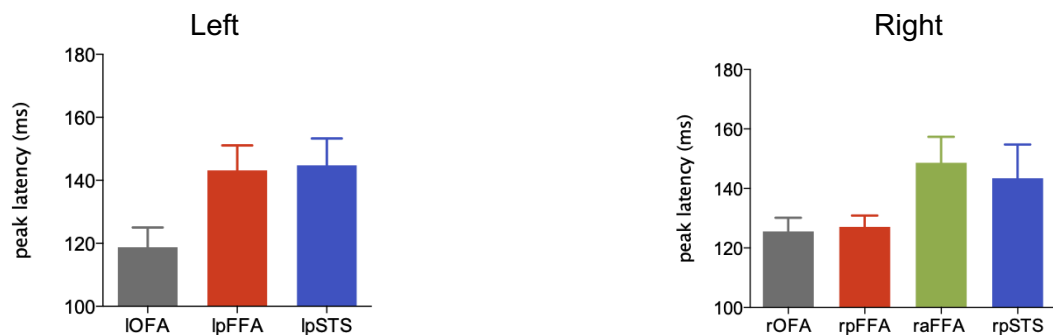

**Figure 2-figure supplement 1. Temporal response characteristics of face-selective ROIs for unfamiliar faces. (A)** The time courses of unfamiliar face (solid line) and object (dotted line) induced responses averaged across subjects, for the seven face-selective ROIs. Shaded area means SEM. **(B)** The peak latency averaged across subjects for each ROI (mean $\pm$  SEM).
