# Supplementary material for: The bottom-up and top-down processing of faces in the human occipitotemporal cortex
Source: eLife journal article supplement (doi:10.7554/elife.48764), 2020-01-14
Supplement: supp [file elife-48764-supp-v1.zip]

Archive with 12 entries (12 files):
- elife_poa_e48764_Figure_4_source_data_1.zip
- elife_poa_e48764_Figure_2_figure_supplement_1.pdf
- elife_poa_e48764_Transparent_Reporting_File.docx
- elife_poa_e48764_Source_code_2.py
- elife_poa_e48764_Figure_5_source_data_1.zip
- elife_poa_e48764_Figure_2_figure_supplement_1_source_data_1.zip
- elife_poa_e48764_Source_code_1.py
- elife_poa_e48764_Figure_1_figure_supplement_1.pdf
- elife_poa_e48764_Figure_3_source_data_1.zip
- elife_poa_e48764_Video_1.mp4
- elife_poa_e48764_Figure_2_source_data_1.zip
- elife_poa_e48764_Source_code_3.py
