# Supplementary material for: The bottom-up and top-down processing of faces in the human occipitotemporal cortex
Source: eLife journal article supplement (doi:10.7554/elife.48764), 2020-01-14
Supplement: supp [file elife-48764-supp-v1.zip › elife_poa_e48764_Figure_1_figure_supplement_1.pdf]

Subject ZJY

fMRI: face>object

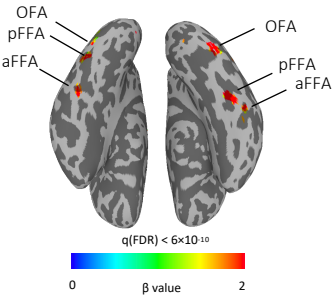

MEG: face

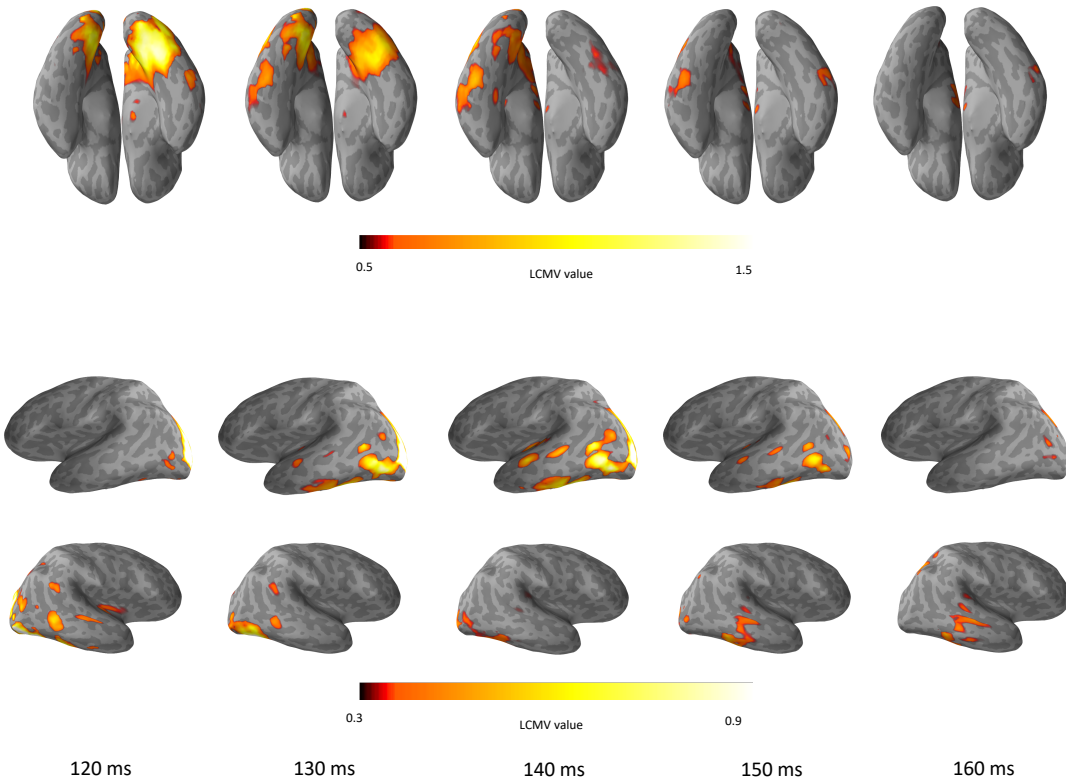

Subject RSW

fMRI: face>object

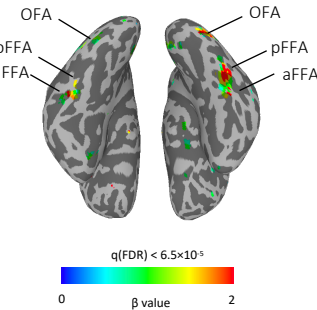

MEG: face

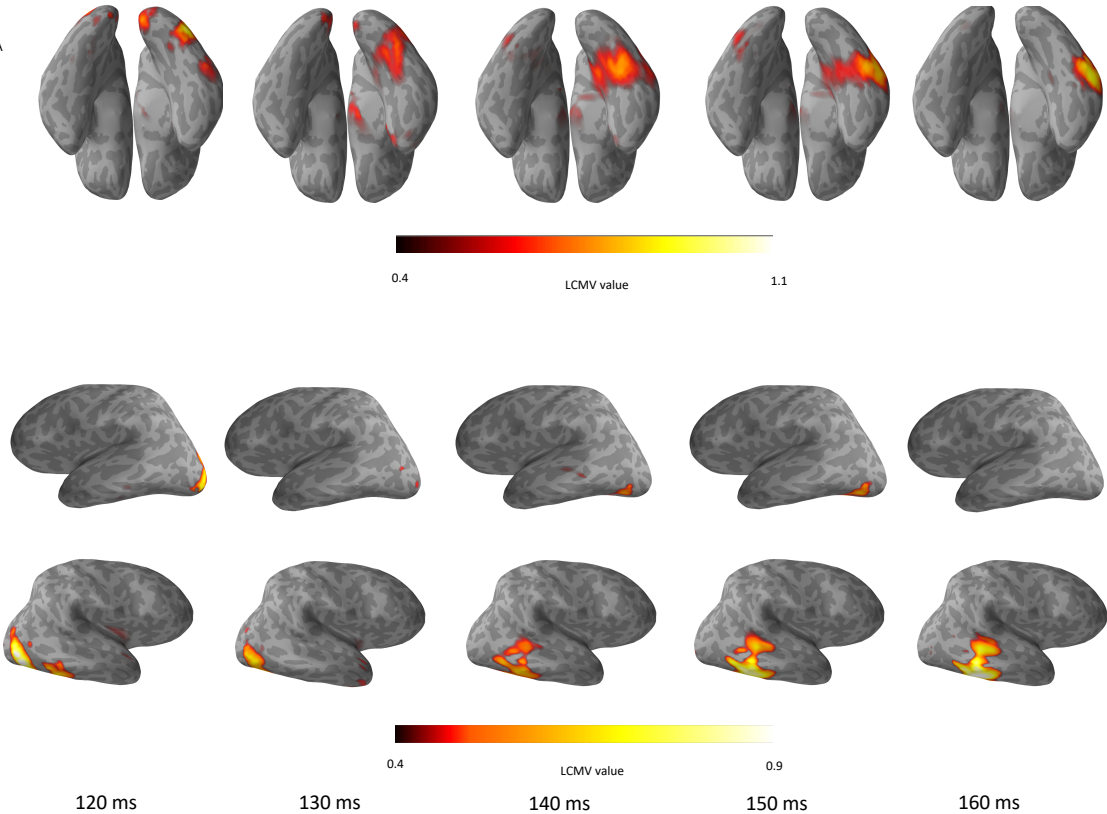

## Subject DR

fMRI: face>object

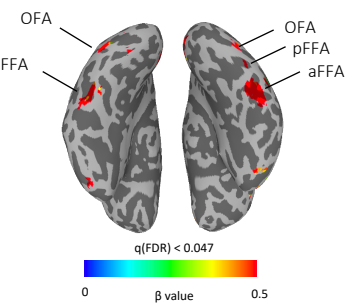

MEG: face

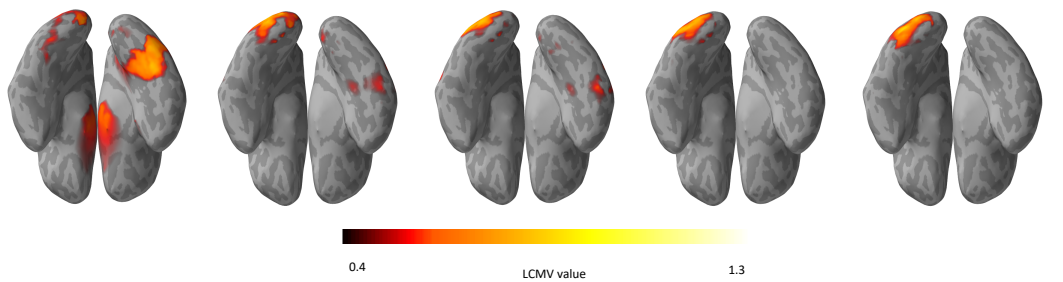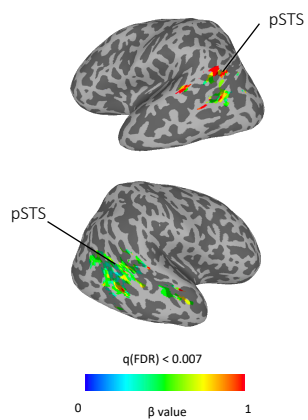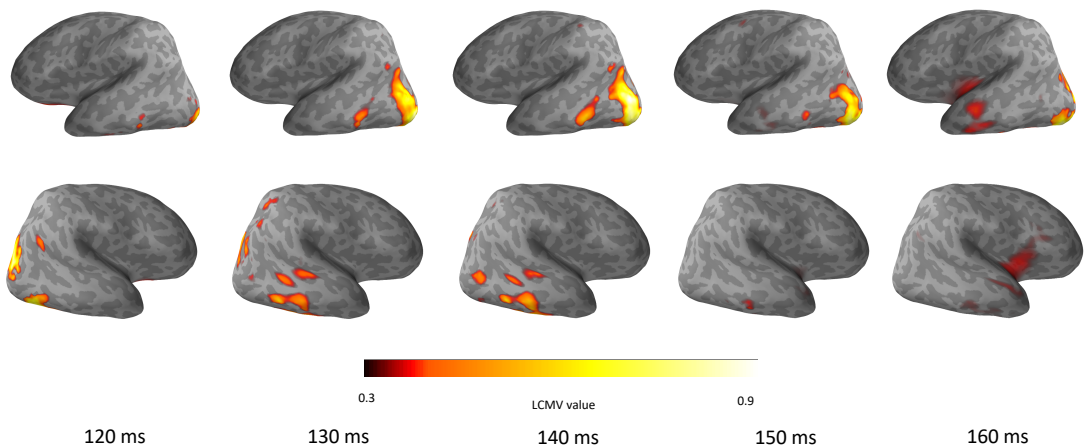

## Subject WYJ

fMRI: face>object

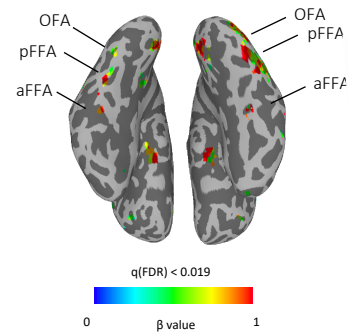

MEG: face

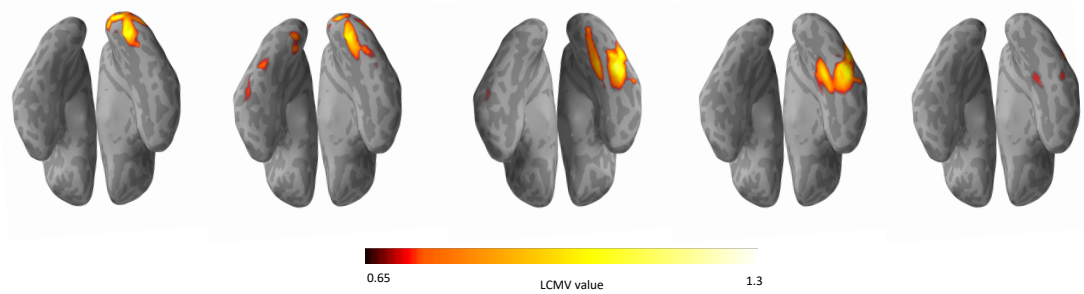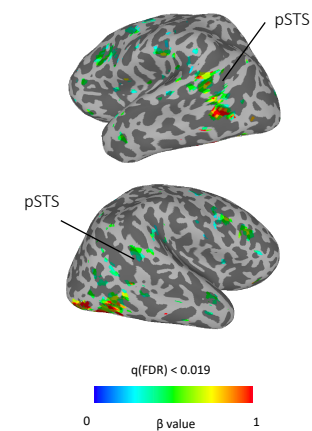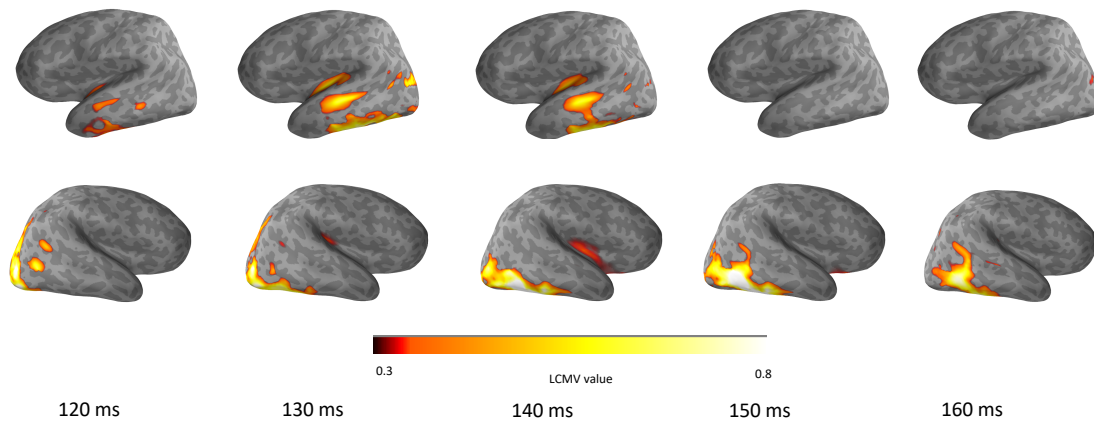

**Figure 1-figure supplement 1. Face-selective areas identified by fMRI localizer and face-evoked MEG source activation displayed on an inflated right hemisphere of four typical subject.** (Left) Face-selective statistical map (faces>objects) showing face-selective regions (OFA, pFFA, aFFA and pSTS). (Right) Face-evoked MEG source activation patterns represented as LCMV value maps at different time points (120-160 ms) after the stimulus onset. LCMV values represent signal power normalized by noise. Results of these four subjects were shown here because of their relatively clear fMRI defined face-selective areas.
