# Supplementary material for: The bottom-up and top-down processing of faces in the human occipitotemporal cortex
Source: eLife journal article supplement (doi:10.7554/elife.48764), 2020-01-14
Supplement: supp [file famous_peak_latency_summary.xlsx]

## Sheet: Sheet1
subjects:	lOFA	lpFFA	lpSTS		rOFA	rpFFA	raFFA	rpSTS
s1	130	138	136		118	118	118	122
s2	143	139	223		132	133	141	144
s3	142	164	132		98	98	174	129
s4	135	138	129		148	156	248	No peak
s5	126	123	103		106	109	149	92
s6	142	102	No peak		111	112	116	181
s7	123	113	173		151	153	No timecourse	220
s8	118	No peak	139		117	138	153	156
s9	95	93	92		108	108	136	192
s10	88	133	179		65	145	147	246
s11	118	136	No peak		130	128	151	151
s12	123	125	211		109	109	125	229
s13	103	109	83		112	123	143	120
There are peak latency (in ms)summary of 13 subjects
