# Supplementary material for: The bottom-up and top-down processing of faces in the human occipitotemporal cortex
Source: eLife journal article supplement (doi:10.7554/elife.48764), 2020-01-14
Supplement: supp [file peak_latency_summary.xlsx]

## Sheet: Sheet1
	Normal face										Mooney face
	lOFA	lpFFA		rOFA	rpFFA	raFFA					lOFA	lpFFA		rOFA	rpFFA	raFFA
s1	68	67		103	127	No timecourse				s1	68	102		236	167	No timecourse
s2	172	170		93	63	111				s2	145	82		104	100	No peak
s3	146	152		No peak	No peak	223				s3	66	116		183	74	143
s4	210	82		102	105	132				s4	241	243		210	107	243
s5	96	97		84	83	No timecourse				s5	128	128		97	97	No timecourse
s6	83	69		126	220	114				s6	112	129		126	114	138
s7	No peak	161		116	123	136				s7	236	240		166	161	119
s8	136	134		153	101	146				s8	98	103		134	87	175
s9	117	213		No peak	No peak	No timecourse				s9	160	124		169	165	No timecourse
s10	124	123		120	166	No timecourse				s10	180	145		104	106	No timecourse
s11	179	222		84	127	250				s11	155	118		120	117	121
s12	80	143		113	110	No timecourse				s12	74	109		143	56	No timecourse
s13	125	133		95	112	125				s13	100	176		186	No peak	169
s14	179	174		68	147	No timecourse				s14	114	118		108	70	No timecourse
s15	No timecourse	108		78	121	120				s15	No timecourse	80		91	240	130
s16	159	No peak		113	96	126				s16	68	118		162.5	94	167
s17	62	59		123	118	No timecourse				s17	117	60		143.3	121	No timecourse
s18	95	175		98	133	69				s18	126	184		212	113	108
s19	152	148		98	106	234				s19	No peak	99		94.2	97	199
s20	84	163		141	147	58				s20	87	90		124	122	53
s21	123	123		92	98	223				s21	139	133		118	89	No peak
s22	112	109		128	128	112				s22	70	73		128	103	198
s23	114	119		110	113	208				s23	175	No peak		142	116	89
s24	52	52		123	120	166				s24	123	133		174	168	No peak
s25	97	128		108	88	No timecourse				s25	92	180		127	118	No timecourse
s26	220	211		103	119	108				s26	184	247		134	131	113
There are peak latency (in ms)summary of 26 subjects
