# Supplementary material for: The bottom-up and top-down processing of faces in the human occipitotemporal cortex
Source: eLife journal article supplement (doi:10.7554/elife.48764), 2020-01-14
Supplement: supp [file peak_latency_summary.xlsx]

## Sheet: Sheet1
	lOFA	lpFFA		rOFA	rpFFA	raFFA
s1	105.8	223		130	130	182.5
s2	162.5	161.7		124.2	120.8	122.5
s3	125	180		142.5	140.8	206
s4	83	180		127.5	136.7	173.3
s5	168	97		115	115.8	165
s6	87.5	147.5		125	151.7	153.3
s7	126.7	145		183	157.5	156.7
s8	107.5	128.3		119.2	120.8	128.3
s9	84	117		120	125	230
There are peak latency (in ms)summary of 9 subjects
