# Supplementary material for: The bottom-up and top-down processing of faces in the human occipitotemporal cortex
Source: eLife journal article supplement (doi:10.7554/elife.48764), 2020-01-14
Supplement: supp [file unfamiliar_face_peak_latency_summary.xlsx]

## Sheet: Sheet1
subjects:	lOFA	lpFFA	lpSTS		rOFA	rpFFA	raFFA	rpSTS
s1	131.667	145.833	140		128.333	127.5	176.667	126
s2	149.167	149.167	148		112.5	114.167	114.167	113
s3	120	164.167	156		140.833	137.5	no timecourse	203
s4	115	133	137		116.667	128.333	159.167	154
s5	99.1667	100	100		110	111.667	130.833	137
s6	90.8333	137.5	175		148.333	147.5	147.5	No peak
s7	135	140.833	130		137.5	133.333	145	148
s8	124.167	130.833	No peak		115	119.167	129.167	No peak
s9	104.167	187	172		120.833	125	186.667	123
There are peak latency (in ms)summary of 9 subjects
